# Supplementary material for: RBPJ, the Major Transcriptional Effector of Notch Signaling, Remains Associated with Chromatin throughout Mitosis, Suggesting a Role in Mitotic Bookmarking
Source: PLoS Genet. 2014 Mar 6;10(3):e1004204. doi: 10.1371/journal.pgen.1004204 (PMC3945225; doi:10.1371/journal.pgen.1004204)
Supplement: Table S4 — GO analysis of RBPJ binding peaks in asynchronous F9 cells. (A) All RBPJ peaks. (B) RBPJ peaks containing the RBPJ binding motif. (C) RBPJ peaks containing the CTCF binding motif. (D) RBPJ peaks containing RBPJ and CTCF binding motifs. (XLSX) [file pgen.1004204.s013.xlsx]

## Sheet:             
	Table S4. GO analysis of RBPJ binding peaks in asynchronous F9 cells
	(A) All RBPJ peaks
	Biological Process	P-Value
	stem cell maintenance	1.49289e-17
	stem cell development	4.73722e-17
	ncRNA metabolic process	7.88509e-17
	ncRNA processing	1.69635e-16
	antigen processing and presentation of peptide antigen via MHC class I	1.48978e-14
	ribosome biogenesis	4.11354e-12
	regulation of translation	6.39508e-12
	negative regulation of myeloid cell differentiation	1.58066e-11
	antigen processing and presentation of exogenous peptide antigen via MHC class I	4.47154e-11
	hindbrain morphogenesis	1.05436e-10
	blastocyst development	1.73325e-10
	cell junction organization	2.04206e-09
	cell junction assembly	4.1191e-09
	organelle assembly	6.79409e-09
	rRNA processing	1.82394e-08
	tRNA metabolic process	2.99557e-08
	rRNA metabolic process	3.03609e-08
	trophectodermal cell differentiation	4.68954e-08
	regulation of gene expression, epigenetic	5.71238e-08
	cell-cell junction organization	7.41897e-08
	calcium ion-dependent exocytosis	1.81929e-07
	tRNA processing	2.07208e-07
	regulation of TOR signaling cascade	2.44951e-07
	regulation of glial cell proliferation	3.27367e-07
	negative regulation of oligodendrocyte differentiation	4.32979e-07
	blastocyst formation	4.60155e-07
	cerebellar cortex development	1.84938e-06
	stem cell division	2.00111e-06
	transcription initiation, DNA-dependent	3.28332e-06
	negative regulation of TOR signaling cascade	3.51363e-06
	cerebellar cortex morphogenesis	4.76572e-06
	cellular response to oxygen levels	4.7833e-06
	cellular response to hypoxia	5.01005e-06
	CRD-mediated mRNA stabilization	6.87934e-06
	cerebellum morphogenesis	1.27285e-05
	neural plate anterior/posterior regionalization	2.06332e-05
	snRNA processing	2.31077e-05
	auditory receptor cell fate commitment	2.71084e-05
	demethylation	5.39599e-05
	neural plate regionalization	6.99373e-05
	positive regulation of TOR signaling cascade	8.70941e-05
	cellular response to glucose starvation	8.95313e-05
	megakaryocyte differentiation	0.000511629
	snRNA metabolic process	0.000513179
	regulation of Cdc42 GTPase activity	0.00287288
	negative regulation of protein kinase B signaling cascade	0.00295016
	(B) RBPJ peaks containing the RBPJ binding motif
	Biological Process	P-Value
	negative regulation of pro-B cell differentiation	4.3355e-08
	antigen processing and presentation of peptide antigen via MHC class I	5.67553e-07
	auditory receptor cell fate commitment	2.04674e-06
	neuron fate determination	6.47382e-06
	auditory receptor cell fate determination	1.0196e-05
	stem cell maintenance	1.09309e-05
	antigen processing and presentation of exogenous peptide antigen via MHC class I	1.2105e-05
	stem cell development	1.63116e-05
	metanephric nephron tubule morphogenesis	3.96371e-05
	trophectodermal cellular morphogenesis	4.00438e-05
	negative regulation of glial cell proliferation	4.02308e-05
	negative regulation of oligodendrocyte differentiation	4.3427e-05
	stem cell differentiation	6.40895e-05
	axial mesoderm formation	0.000115956
	trophectodermal cell differentiation	0.000154541
	negative regulation of cytokine production	0.000180862
	metanephric nephron morphogenesis	0.0002082
	formation of primary germ layer	0.000336038
	regulation of T cell activation	0.000337199
	positive regulation of peptidyl-serine phosphorylation	0.000352258
	metanephric epithelium development	0.000372328
	somatic stem cell maintenance	0.000409087
	endoderm formation	0.00059866
	regulation of peptidyl-serine phosphorylation	0.00063836
	(C) RBPJ peaks containing the CTCF binding motif
	Biological Process	P-Value
	regulation of leukocyte mediated immunity	1.34545e-06
	regulation of immune response	1.69435e-06
	regulation of lymphocyte mediated immunity	1.75775e-06
	positive regulation of immune response	2.31857e-05
	regulation of immune effector process	3.02973e-05
	cell junction organization	0.000192674
	cell-cell junction organization	0.00019361
	immune response-regulating signaling pathway	0.000228201
	immune response-activating signal transduction	0.000329972
	cell junction assembly	0.000345788
	immune response-activating cell surface receptor signaling pathway	0.000451462
	positive regulation of immune effector process	0.000462794
	(D) RBPJ peaks containing RBPJ and CTCF motifs
	no terms
